1 **Investigating the origin of the Belgian second SARS-CoV-2 wave by using**  
2 **(pre)admission screening samples.**

3 Naesens Reinout<sup>1,2</sup>, Heireman Laura<sup>1</sup>, Vandamme Sarah<sup>3</sup>, Willems Philippe<sup>4,5</sup>, Van Herendael  
4 Bruno<sup>4,5</sup>, Verstrepen Walter<sup>1</sup>, De Schouwer Pieter<sup>1</sup>, Bruynseels Peggy<sup>1,2</sup>

5 **Affiliations:**

6 <sup>1.</sup> Department of Medical Microbiology, ZiekenhuisNetwerk Antwerpen, B-2020  
7 Antwerp, Belgium

8 <sup>2.</sup> Department of Infection Prevention and Control, ZiekenhuisNetwerk Antwerpen, B-  
9 2020 Antwerp, Belgium

10 <sup>3.</sup> Department of Medical Microbiology, University Hospital Antwerp, B-2650 Edegem,  
11 Belgium

12 <sup>4.</sup> Department of Medical Microbiology, GasthuisZusters Antwerpen, B-2060 Antwerp,  
13 Belgium

14 <sup>5.</sup> Department of Infection Prevention and Control, GasthuisZusters Antwerpen, B-2060  
15 Antwerp, Belgium

16

17 **Corresponding Author:** Reinout Naesens **Corresponding Author Email:**

18 [reinout.naesens@zna.be](mailto:reinout.naesens@zna.be)

19 **Abstract**

20 The goal of this study was to estimate rates of SARS-CoV-2 carriership and viral loads in the  
21 general Antwerp population and to compare the estimated prevalences and incidences with  
22 governmental data (numbers of detected positive cases, stringency measure index) in order to  
23 evaluate the dynamics leading to the second wave. We used (pre)admission screening results  
24 from the major Antwerp hospitals for estimating community prevalences and incidences.  
25 43.545 samples were included (April – November 2020). High SARS-CoV-2 carriership rates  
26 (mean week prevalence of 1.3%) were found in the general Antwerp population. 35.4% of  
27 positive cases carried high viral loads. Only a small proportion (15.3%) of the viral circulation  
28 was detected by the nationally implemented testing policy. In the weeks before the second  
29 Belgian wave, increasing prevalences and incidences were found, together with country-wide  
30 easing of restriction measures. In our opinion these findings have led to origin of the second  
31 viral wave.

32 **Keywords:** SARS-CoV-2; Belgium; second wave; driver; contact-tracing; prevalence;  
33 incidence

34 **Conflict of interest:** None

35 **Funding statement:** No funding

## 36 INTRODUCTION

37 Since March 2020, the world has been in the grips of a pandemic caused by the Severe Acute  
38 Respiratory Syndrome virus type 2 (SARS-CoV-2) leading to excess mortality and morbidity.  
39 The virus has a detrimental impact on both economic and psycho-social well-being<sup>1</sup>.

40 Belgium was highly impacted, having had to deal with two waves up to November 2020: the  
41 first from the beginning of March to the end of May, the second during the fall (showing a  
42 decline in November). The first wave was contained by implementing a full lockdown starting  
43 on 14 March 2020. The first measures to ease restrictions were introduced on 4 June 2020.

44 Despite warnings from various Belgian key expert virologists and epidemiologists in  
45 September 2020, the government decided to ease restrictions further, having been encouraged  
46 by various pressure groups and public opinion. Belgium faced its second wave as from  
47 October 2020 (Figure 1).

48 Until now, little is known about the dynamics and prevalence of asymptomatic carriership and  
49 viral loads in the general Belgian population<sup>2</sup>. Furthermore, the role of the different age  
50 categories in the viral spread has not been fully elucidated<sup>3</sup>.

51 Since the major Antwerp hospitals implemented extensive (pre-)admission screening of  
52 asymptomatic cases in April 2020 (eg. prior to elective surgery or endoscopic procedures),  
53 and have continued to do so, they possess valuable information regarding the actual  
54 prevalence of the virus in the general population throughout the pandemic period.

55 The goal of this study was to determine rates of carriership and viral loads in the general  
56 population and to evaluate the dynamics leading to the onset of the second Belgian wave.

57

## 58 **METHODS**

### 59 DATA COLLECTION

60 During the period 27 April to 15 November 2020, we collected SARS-CoV-2 positivity data  
61 from (pre)admission screenings from the following hospitals: the Antwerp University  
62 Hospital (UZA), the multiple site public hospital ZiekenhuisNetwerk Antwerpen (ZNA), and  
63 the major multiple site private Antwerp hospital GemeenschapsZusters Antwerpen (GZA).  
64 Together they account for approximately 90% of hospital bed capacity (3697 hospital beds) in  
65 the city of Antwerp.

66 (Pre-)admission screenings were defined as follows: pre-hospital screenings prior to elective  
67 admissions (GZA, UZA, ZNA), and systematic admission screenings in asymptomatic  
68 patients admitted for other reasons than COVID-19 (GZA, UZA). Screenings of high/low risk  
69 contacts or individuals with symptoms were excluded.

70 A distinction in test indications was obtained by implementing different sample flows per  
71 indication (pre-admission screenings were performed by a nurse at patients' homes for the  
72 inclusions from UZA and ZNA, and screenings performed in a drive-through swab laboratory,  
73 or during a pre-visit at the swab laboratory, from UZA and GZA respectively). Unique test  
74 codes were also used by GZA and UZA for registering the swab samples in the Laboratory  
75 Information System (LIS).

76 Samples were analysed in the laboratory attached to the hospital of the prescribing physician.  
77 All laboratories are certified by the Belgian government (BELAC). The following molecular  
78 techniques and platforms were used:

79 In the clinical laboratory of GZA, nucleic acids were extracted on STARlet IVD® (Seegene  
80 INC., Seoul, Korea) using the Viral DNA/RNA C-kit. Subsequently SARS-CoV-2 qPCR  
81 (CDC N1 target) was performed on a Quantstudio 7 flex qPCR cycler® of Thermo Fisher

82 Scientific (Waltham, MA, USA) according to the protocol published by the Centers of  
83 Disease Control and Prevention (CDC).

84 The laboratory of UZA used the Xpert Xpress SARS-CoV-2 test detecting E and N2 target on  
85 the GeneXpert® Platform (Cepheid, USA) as per manufacturer's instructions. Alternatively,  
86 an in-house PCR was performed detecting E target according to Corman *et al.* 2020 with  
87 extraction on NucliSens EasyMag® (Biomérieux, France) or QiaSymphony® (Qiagen, The  
88 Netherlands) and amplification with Cobas LightCycler 480 II® or Cobas z480 (Roche  
89 Molecular Diagnostics, Switzerland). Alternatively, a BD MAX SARS-CoV-2 kit was used  
90 detecting N1 and N2 target with an all-in one extraction amplification on the BD MAX®  
91 platform (Becton Dickinson, USA).

92 In the laboratory of ZNA, nucleic acids were extracted on MagNA Pure 96 using the MagNA  
93 Pure 96 DNA and Viral NA Small Volume Kit (Roche Molecular Diagnostics, Switzerland).  
94 Subsequently SARS-CoV-2 qPCR (N1 target) was performed on a LightCycler 480 qPCR  
95 cycler according to the protocol published by the CDC. Alternatively, nucleic acids were  
96 extracted on KingFisher Flex using the MagMAX Viral/Pathogen II Nucleic Acid Isolation  
97 Kit. These extracts were analysed on a Quantstudio 5 qPCR cycler using the TaqPath™  
98 COVID-19 CE-IVD RT-PCR Kit (ThermoFisher Scientific).

99 The parameters postal code, age, PCR result (associated with PCR platform used) and cycle  
100 threshold (Ct) value (or alternatively Crossing point (Cp)) if available (GZA, ZNA) were  
101 retrieved from the LIS for each patient, and transferred to a central ZNA-based and secured  
102 database.

103 The following data were collected from the Belgian governmental scientific institution,  
104 Sciensano<sup>4</sup>: absolute numbers (weekly) of positively detected cases for Antwerp province,

105 admitted patients at the hospital for Antwerp province, and returning travelers in August 2020  
106 with positivity rate (only available on national level).

107 The following data were collected from the Flemish Agency for Care and Health  
108 (governmental agency responsible for the contact-tracing policy) for Antwerp province by  
109 using the information from the web-based and secured database (Controle-toren)<sup>5</sup>:  
110 percentages (weekly) of successfully (by phone) contacted positive cases in the Antwerp  
111 province. Age distributions for the Antwerp province were obtained from Statistiek  
112 Vlaanderen<sup>6</sup>.

113 We used the Oxford COVID-19 Government Response Stringency index to estimate  
114 governmental measures. The index goes from zero (no restrictions) to hundred (strictest)<sup>7</sup>.

115

## 116 DATA ANALYSES AND DEFINITIONS

117 Cases with domicile outside the Antwerp province were excluded for further analysis. SARS-  
118 CoV-2 carriership was estimated by calculation of the weekly asymptomatic positivity rate in  
119 the study population. The incidence was calculated by using an estimated duration of PCR  
120 positiveness of seventeen days as was found by Cevik and colleagues<sup>8</sup>. The percentage of the  
121 cohort infected by SARS-CoV-2 (for the whole investigated period) was calculated by adding  
122 up all estimated week incidences. By dividing the absolute weekly numbers of positively  
123 tested cases in the province by the number of province inhabitants (1.858 million) in the  
124 province, the percentage of positively tested patients in the Antwerp province was calculated.  
125 The percentage of weekly new COVID-19 hospital admitted patients in the Antwerp province  
126 was calculated by dividing the absolute weekly number of admitted patients by the number of  
127 inhabitants in the province.

128 Viral loads (only available for GZA and ZNA) were calculated by extrapolation of the Ct/Cp  
129 values corresponding to 5000 genome equivalents per mL of the AccuPlex™ SARS-CoV-2  
130 full genome reference material (Seracare). A high viral load was defined as  $\geq 256\ 000$  viral  
131 copies/mL<sup>9</sup>. Ratios of positive cases (on a weekly basis; all inclusions) with high viral loads  
132 were plotted on the same timeline as the plotted estimated incidences.

133

134 Mean positivity ratios per age decade (0-10 y, 11-20 y, 21-30 y, 31-40 y, 41-50 y, 51-60 y,  
135 61-70 y, 71-80 y, 81-90 y, 90+ y) were investigated for the investigated cohort. Positivity  
136 ratios of carriership were calculated for preschools (0-4 y), primary schools (5-11 y) and  
137 secondary schools (12-18 y). The mean positivity ratio was also assessed for (pre)school  
138 children (0-18 y) and the elderly (+80 y). Box-whisker plots represent the viral load among  
139 different age categories.

140

141 Ethical approvals were obtained by the hospital Institutional Boards (GZA: Approval N°  
142 200906RETRO; UZA: Approval N°001355; ZNA: Approval N° 5416).

143 **RESULTS**

144

145 Overall, 43.545 cases were identified of which 38.763 cases (89.0%) were included. The  
146 results of 4782 cases (11.0%) were excluded since domicile (based on postal code) was  
147 outside Antwerp province. GZA, UZA, and ZNA accounted for respectively 53.2%, 34.6%  
148 and 10.7% of included cases. The overall SARS-CoV-2 positivity rate was 1.3% (n=520).  
149 Younger age groups (<21 years old) were underrepresented in the investigated cohort as  
150 compared to the Antwerp province (9.0 % versus 22.3%;  $p < 0.01$ ). Age groups of > 70 years  
151 old were overrepresented in the cohort (25.0 % versus 14.1 %,  $p < 0.01$ ). The distribution of  
152 cases was not equally dispersed throughout Antwerp province with an underweight of cases  
153 from the city of Antwerp versus the Antwerp province (20.8% of cases had domicile in the  
154 city of Antwerp, versus 26.8 % of inhabitants for the whole Antwerp province  $p < 0.01$ ). Cases  
155 with domicile in the city of Antwerp (n = 8067) had an overall positivity rate of 1.8%,  
156 whereas cases with domicile outside the city of Antwerp (n = 30696) had an overall positivity  
157 rate of 1.2% ( $p < 0.01$ ).

158

159 Estimated carriership (with high viral loads), estimated weekly new cases and number of  
160 admissions are shown in Figure 1. Calculated weekly cohort carriership varied between 0.1 %  
161 (week of 29 June) and 8.6 % (week of 26 October). The mean week percentage was 1.5%.  
162 The calculated ratio of carriership with high viral loads varied between 0% (week of 11 May,  
163 18 May, 1 June, 22 June, 29 June, 6 July, 13 July and 24 August) and 6.7 % (week of 26  
164 October). The mean week ratio was 0.8%. Overall, the percentage of positive carriers with  
165 high viral loads was 35.4 %. The calculated weekly incidence varied between 0.0% (see  
166 Figure 2) and 6.5 % (week of 19 October). The mean week incidence was 0.7%. Overall, we  
167 calculated that 20.3 % of the investigated cohort became infected with SARS-CoV-2 in the



168 period from 27 April to 15 November. 3.1 % of Antwerp province inhabitants tested positive  
169 in the investigated period (Sciensano data). In August 2020, 1.4 million Belgians (12.2% of  
170 Belgian population) filled in a Passenger Locator Form. 2% of travelers tested positive for  
171 SARS-CoV-2. On population level, this equals a potential increase of 0.2% in SARS-CoV-2  
172 carrier-rate.

173 The percentage of weekly new hospital admissions varied between 0.00% (see Figure 1) and  
174 0.02% (week of 26 October, 2 November, and 9 November) of the Antwerp province  
175 population. The mean ratio of weekly detected cases versus the estimated weekly incidence  
176 was 29.1 % (range: 2.9 % - 100 %). The percentage of successfully contacted positive cases  
177 varied between 54.0% (week of 22 June) and 94.0 % (week of 26 October) for the Antwerp  
178 province with a mean percentage of successfully contacted positive cases of 83.0% (data only  
179 available from 1 June to 15 November since registration only started on 1 June).

180 The SARS-CoV-2 positivity rate according to age is 0.9% (95 % Confidence Interval (CI):  
181 0.4 – 1.5 %) (n= 1292) for daycare children (0-4 years), 1.0% (95 % CI: 0.5 – 1.9 %) (n= 877)  
182 for primary school children (5-12 years), 0.8% (95 % CI: 0.3 – 1.6 %) (n = 878) for secondary  
183 school children (13-18 years), 0.9% (95 % CI: 0.6 – 1.3 %) (n= 3047) for overall school-aged  
184 civilians (0-18 years), 1.4% (95 % CI: 1.3 – 1.5 %) (n = 35637) for adults (>18 years) and  
185 2.6% (95 % CI: 2.1 – 3.2 %) (n = 4033) for the elderly (>80 years). The distribution of viral  
186 loads and ratios of carriers with high viral loads among different age categories are presented  
187 in Figure 2 and 3 respectively.

188 The results of the Oxford Stringency Index are shown in Figure 1.

189 **DISCUSSION**

190 Numerous reports provide data indicating that asymptomatic (or pre-symptomatic) subjects  
191 can transmit COVID-19 with high efficiency<sup>10,11</sup>. In the living review paper of Buitrago-  
192 Garcia, the secondary attack rate is only slightly lower in contacts of people with  
193 asymptomatic infection than in those with symptomatic infection (relative risk 0.35, 95% CI  
194 0.10-1.27)<sup>12</sup>. Mathematical modelling studies (not peer reviewed) have suggested that  
195 asymptomatic individuals might be major drivers for the growth of the COVID-19  
196 pandemic<sup>13</sup>.

197 We found high positivity ratios of asymptomatic carriership in our investigated cohort of  
198 Antwerp inhabitants throughout the investigated pandemic period (27 April to 14 November  
199 2020). Lowest positivity ratios were seen at the end of June (week of 29 June): after a period  
200 of a full lockdown and only minor easing of containment measures, SARS-CoV-2 positivity  
201 ratios were found to be at levels of 1 out of 1000 samples. Similar or even far lower  
202 prevalences led to massive screening programs in China in order to stop further viral spread<sup>14</sup>.

203 Taking into account the SARS-CoV-2 key transmission epidemiological parameters  
204 (estimated  $R_0$  factor of 2.0 and a dispersion factor of 0.10), a strategy accepting prevalences  
205 above 1% (the overall average in our cohort being 1.3 %) together with the simultaneously  
206 reopening of a locked community were, in our opinion, the perfect ingredients for rapid  
207 escalation towards a subsequent second national wave<sup>15</sup>. This finding is important as Belgium  
208 has chosen a strategy of accepting significant circulation of the virus within the population  
209 without having an accurate insight of past and actual viral prevalences (in contrast to eg.  
210 Luxemburg and China, where thorough search and/or isolation programs have been set  
211 up)<sup>14,16</sup>. Also, pressure is already increasing to further ease the contingency measures taken in  
212 order to control the second wave.

213 The finding that, due to the implemented testing and tracing strategy, only marginal numbers  
214 of positive cases were detected (we estimated that, by extrapolation of cohort data, 20.3 % of  
215 the Antwerp population contracted the virus in the study period, but only 3.1 % (15.3% of  
216 estimated positive cases) were effectively tested positively) and subsequently traced (83,  
217 range: 54 % - 94 %), even in the periods of upward movement of the curves, was probably  
218 another important contributing factor to the uncontrollable rapid further viral spread seen in  
219 October 2020. The hypothesis of underestimated viral circulation in Belgium has also been  
220 put forward by Herzog and colleagues, by analyzing epi-serological data<sup>17</sup>. Since we only  
221 measured the base-line (population wide) prevalence, our estimation may even be an  
222 underestimation of the real viral circulation, since outbreaks and clusters are not represented  
223 in our analysis, but may have been picked up in documented testing numbers (Sciensano). On  
224 the other hand, the underrepresentation of the younger age groups versus the  
225 overrepresentation of the older age groups in the investigated cohort leads to an upward bias.

226 Furthermore, backward tracing has not been implemented optimally to date by the  
227 governmental task force<sup>18</sup>. We argue that the Belgian testing and tracing strategy was not able  
228 to contain and monitor the pandemic in Belgium adequately, this being one of the major  
229 ingredients of a failing containment policy leading to the second national wave.

230 The province of Antwerp was one of the three Belgian provinces (out of 10) with highest  
231 number of tests per inhabitants<sup>4,5</sup>. There is no reason for postulating an exceptional role of  
232 Antwerp province in Belgium as being a highly affected province. Inversely, the southern part  
233 of the country was affected more severely in the second wave, as shown in the governmental  
234 Sciensano data.

235 Interestingly, we also found higher proportions of carriers in the city of Antwerp (1.8%) than  
236 in the province of Antwerp (1.2%;  $p < 0.01$ ). This reflects a national trend: the second wave  
237 was more prevalent in crowded bigger capital cities<sup>4</sup>.

238 With regard to positivity ratios according to age category, we found high numbers (around 1  
239 % throughout the investigated period) in school children and young adults (0-30 years).

240 Positivity ratios of young adults (21-40 years-old) were significantly higher than the adult  
241 population aged 51-70 years ( $p < 0.01$ ).

242 Although the role of children as main drivers of transmission is still debated, our finding may  
243 be another argument for active transmission in these age groups<sup>20,21,22</sup>. A recent  
244 seroprevalence survey in two Belgian municipalities (one highly affected, the other hardly  
245 affected) also showed equivalent proportions of infections in primary school children versus  
246 adolescents in the first three years of secondary education<sup>23</sup>.

247 On the other hand, if children were equally susceptible, one might expect even higher rates of  
248 carriership, since children were less restricted in the number of contacts (summercamps,  
249 schools were open from 1 September 2020). Since we were not able to correct for number of  
250 contacts, we cannot further determine the value of this hypothesis.

251 With regard to age distribution, another interesting finding is the high overall percentage of  
252 positivity ratios in the elderly (+70 y). In our hypothesis, this is the reflection of the  
253 augmented transmission risks in residential care homes.

254 We also found significant proportions of carriers with high viral loads (on average 35.4 % of  
255 all inclusions). In the week of 26 October, we estimate that 7.0% of Antwerp inhabitants were  
256 carrying high viral loads. Evaluating the whole investigated period, on average 0.7% of the  
257 population was carrying high viral loads. Although the link of viral load with contagiousness  
258 has not been established, this might have been an important factor in the spread of the virus<sup>19</sup>.

259 Viral loads in younger age groups were not lower than viral loads in the working age  
260 population. (Figure 2) In another non-peer-reviewed publication, it was also shown that there  
261 is no significant difference between viral loads in 1-20 year-olds as compared to 21-100 year-

262 old adults<sup>24</sup>. Furthermore, another study suggests that the viral load in children below 5 years  
263 of age with mild to moderate COVID-19 symptoms is higher than in older children and  
264 adults<sup>25</sup>.

265 In our hypothesis, positive children may have further introduced the virus into households,  
266 which suggests that this is a potentially underestimated factor in the derailing of the situation  
267 in September 2020.

268 Interestingly, we found significantly higher proportions of carriers with high viral loads in the  
269 elder age categories. The combination of higher prevalences and higher ratios of carriers with  
270 high viral loads in this age group might be an important driver of the abundance of outbreaks  
271 and associated excess morbidity and mortality seen in retirement homes.

272 Overall, not recognizing the presence and potential important role of the asymptomatic  
273 carriers with higher viral loads may also have been another ingredient which led to the  
274 subsequent second wave.

275 In our opinion, the role of the returning travelers was very limited. In August 12.2 % of the  
276 Belgian population filled in a Passenger Locator form. About 2% of returning travelers tested  
277 positive. On a population level, this may have led to an increase of 0.2% in carriership rates.

278 On the positive side, we found that by implementing strict contingency measures (i.e.  
279 following the tightening and easing advice of experts) even substantial viral circulation of  
280 around 1% can be controlled: the ratio of positive carriers was contained in the period  
281 between 27 April and 14 September (19 weeks) without overstressing health care capacities.

282 However, the efforts required to maintain controllable containment were enormous, thereby  
283 putting high pressure on social (limited number of contacts) and economic well-being (Oxford  
284 Stringency Index not below 50.0 between 27 April and 14 September).

285 Finally, we come to our last driver of the second wave, probably the most important one. Mid  
286 to end September, key Belgian epidemiologists, virologists and biostatisticians warned the  
287 temporary government of the possible rapid escalation in numbers of new infections and  
288 admissions, based on available data. The government decided not to follow their advice, and  
289 implemented a strategy that eased restriction measures (Oxford Stringency Index on 14  
290 September: 52.8; 5 October: 47.2) in a time when there was a steadily increasing number of  
291 new infections (incidence increased from 0.9% the week of 14 September to 2.3% the week of  
292 5 October). They were being encouraged to carry out this strategy by various pressure groups.  
293 In October, Belgium was facing a second wave with a rapid increase in numbers of COVID  
294 admissions, thereby highly impacting the health care system and hospital facilities.

295 The limitations of this study include that (weak positive) asymptomatic cases could have  
296 corresponded to previous infections with persistent existence of detectable RNA. This may  
297 have biased the results. However, the rapid decrease of positivity ratios after the  
298 implementation of extra measures (second pandemic wave) suggests we predominantly  
299 included active infections. Although the phenomenon of prolonged shedders does certainly  
300 exist, our data suggest that it is relatively insignificant and does not affect the major findings  
301 in this paper. Also, the median duration of positive results has been shown to be two to three  
302 weeks<sup>4</sup>. Another limitation is that we did not follow up positive/negative cases. We did not  
303 link the data to secondary COVID-19 cases, thus not establishing the contagiousness of  
304 positive cases. The screenings were linked to hospital procedures/admissions. Although we  
305 can accept these screenings as random samples from the community, the cohort is not a  
306 representative sample from the community: data points were not equally distributed in the  
307 Antwerp province, and age distributions were not representative for the Antwerp province  
308 (underestimation of younger age groups, and overestimation of older age groups).

309 In conclusion, we found that SARS-CoV-2 was significantly present in the Antwerp province  
310 population in the period after the first wave. The virus circulated in all age groups with a  
311 predominance in the elderly. 1.3% of the investigated cohort tested positive for SARS-CoV-  
312 2 with 35% carrying high viral loads. The testing and contact-tracing policy only detected a  
313 small proportion of the real viral circulation. The restriction measures were eased in a period  
314 of increasing incidences. The combination of these factors were, in our opinion, the  
315 ingredients for the onset of the second wave. If Belgium chooses to accept a certain viral  
316 circulation, a very strict barometer has to be put into place, in order to prevent further  
317 worsening of the pandemic situation. The positivity rates in (pre)admission screening results  
318 may be an important tool;

319

320 **Acknowledgements:** None

321

322 **Author Bio:**

323 Dr. Reinout Naesens is Head of the Infection Prevention and Control Department and member  
324 of the Medical Microbiology Department of the ZNA group, the largest public hospital in  
325 Belgium.

326 **REFERENCES**

- 327 1. World Health Organisation, World Health Organisation situation reports,  
328 <https://www.who.int/emergencies/diseases/novel-coronavirus-2019/situation-reports>.  
329 Accessed 2 december 2020.
- 330 2. Byambasuren O, Cardona M, Bell K, Clark J, McLaws M-L, Glasziou P. Estimating  
331 the extent of true asymptomatic COVID-19 and its potential for community  
332 transmission: systematic review and meta-analysis. medRxiv. 2020; (published online  
333 September 13.) (preprint) doi: <https://doi.org/10.1101/2020.05.10.20097543>
- 334 3. Castagnoli R, Votto M, Licari A, Brambilla I, Bruno R, Perlini S, et al. Severe Acute  
335 Respiratory Syndrome Coronavirus 2 (SARS-CoV-2) Infection in Children and  
336 Adolescents: A Systematic Review. JAMA Pediatr. 2020;174:882-889.  
337 doi:10.1001/jamapediatrics.2020.1467.
- 338 4. Sciensano, <https://epistat.wiv-isp.be/covid/>. Accessed 2 december 2020.
- 339 5. Toezicht Volksgezondheid, <https://zorgatlas.vlaanderen.be>. Accessed 2 december  
340 2020.
- 341 6. Statistiek Vlaanderen, [https://www.statistiekvlaanderen.be/nl/bevolking-naar-leeftijd-  
342 en-geslacht](https://www.statistiekvlaanderen.be/nl/bevolking-naar-leeftijd-en-geslacht). Accessed 2 december 2020.
- 343 7. Oxford COVID-19 Government Response Tracker, <https://covidtracker.bsg.ox.ac.uk/>.  
344 Accessed 2 december 2020.
- 345 8. Cevik M, Tate M, Lloyd O, Maraolo AE. SARS-CoV-2, SARS-CoV, and MERS-CoV  
346 viral load dynamics, duration of viral shedding, and infectiousness: a sytematic review  
347 and meta-analysis. Lancet Microb. 2020. Online first. doi:  
348 [https://doi.org/10.1016/S2666-5247\(20\)30172-5](https://doi.org/10.1016/S2666-5247(20)30172-5).



- 349 9. Bullard J, Dust K, Funk D, Strong JE, Alexander D, Garnett L, et al. Predicting  
350 infectious SARS-CoV-2 from diagnostic samples. *Clin Infect Dis.* 2020;22:ciaa638.  
351 doi: 10.1093/cid/ciaa638.
- 352 10. Koh WC, Naing L, Chaw L, Rosledzana MA, Alikhan MF, Jamaludin SA, et al. What  
353 do we know about SARS-CoV-2 transmission? A systematic review and meta-analysis  
354 of the secondary attack rate and associated risk factors. *PLoS One.*  
355 2020;15(10):e0240205. doi: 10.1371/journal.pone.0240205.
- 356 11. Mizumoto K, Kagaya K, Zarebski A, Chowell G. Estimating the asymptomatic  
357 proportion of coronavirus disease 2019 (COVID-19) cases on board the Diamond  
358 Princess cruise ship, Yokohama, Japan, 2020. *Euro Surveill.* 2020;25(10):2000180.  
359 doi: 10.2807/1560-7917.ES.2020.25.10.2000180.
- 360 12. Buitrago-Garcia DC, Egli-Gany D, Counotte MJ, Hossmann S., Imeri H, Ipekci AM,  
361 et al. Asymptomatic SARS-CoV-2 infections: a living systematic review and meta-analysis.  
362 medRxiv. 2020; (published online July 28.) (preprint) doi:  
363 <https://doi.org/10.1101/2020.04.25.20079103>.
- 364 13. Dobrovolny HM. Modeling the role of asymptomatics in infection spread with  
365 application to SARS-CoV-2. *PLoS One* 2020; 15:e0236976. doi:  
366 10.1371/journal.pone.0236976.
- 367 14. Health Commission of Hubei Province. Daily report on epidemic situation of COVID-  
368 19 in Hubei province.  
369 <http://wjw.hubei.gov.cn/bmdt/ztzl/fkxxgzbdgrfyyq/xxfb/index.shtml>. Accessed 2  
370 december 2020.
- 371 15. Kucharski AJ, Russell TW, Diamond C, Liu Y, Edmunds J, Funk S, Eggo RM; Centre  
372 for Mathematical Modelling of Infectious Diseases COVID-19 working group. Early

- 373 dynamics of transmission and control of COVID-19: a mathematical modelling study.  
374 Lancet Infect Dis. 2020; pii:S1473-3099(20)30144-4.
- 375 16. <https://covid19.public.lu/en/testing.html> Accessed 2 december 2020.
- 376 17. Herzog S, Abrams S, Wouters I, Ekinici E, Pateet L, Coppens A, et al. Seroprevalence  
377 of IgG antibodies against SARS coronavirus 2 in Belgium – a serial prospective cross-  
378 sectional nationwide study of residual samples. medRxiv. 2020; (published online  
379 October 1.) (preprint) doi: <https://doi.org/10.1101/2020.06.08.20125179>.
- 380 18. Endo A; Leclerc QJ, Knight GM, Medley GF, Atkins KE, Funk S, et al. Implication of  
381 backward contact tracing in the presence of overdispersed transmission in COVID-19  
382 outbreaks. Wellcome Open Res. 2020;5:239. doi: 10.12688/wellcomeopenres.16344.1.
- 383 19. Zou L, Ruan F, Huang M, Liang L, Huang H, Hong Z, et al. SARSCoV-2 Viral Load  
384 in Upper Respiratory Specimens of Infected Patients. N Engl J Med. 2020;382:1177-  
385 1179. doi: <https://www.nejm.org/doi/full/10.1056/NEJMc2001737>.
- 386 20. Jones TC, Mühlemann B, Veith T, Biele G, Zuchowski M, Hoffmann J, et al. An  
387 analysis of SARS-CoV-2 viral load by patient age. medRxiv. 2020; (preprint) doi:  
388 <https://doi.org/10.1101/2020.06.08.20125484>.
- 389 21. Viner RM, Russell SJ, Croker H, Packer J, Ward J, Stansfield C, et al. School closure  
390 and management practices during coronavirus outbreaks including COVID-19: a rapid  
391 systematic review. Lancet Child & Adolescent Health. 2020;4(5):397-404. doi:  
392 10.1016/S2352-4642(20)30095-X.
- 393 22. Heavey L, Casey G, Kelly C, Kelly D, McDarby G. No evidence of secondary  
394 transmission of COVID-19 from children attending school in Ireland, 2020. Euro  
395 Surveillance: bulletin Europeen sur les maladies transmissibles = European  
396 communicable disease bulletin. 2020;25(21). doi: 10.2807/1560-  
397 7917.ES.2020.25.21.2000903.

- 398 23. Sciensano, [https://www.sciensano.be/sites/default/files/limburg-validation-sars-](https://www.sciensano.be/sites/default/files/limburg-validation-sars-cov2_report_20201112_final.pdf)  
399 [cov2\\_report\\_20201112\\_final.pdf](https://www.sciensano.be/sites/default/files/limburg-validation-sars-cov2_report_20201112_final.pdf). Accessed 2 December 2020.
- 400 24. Jones TC, Mühlemann B, Veith T, Zuchowski M, Hofmann J, Stein A, et al. An  
401 analysis of SARS-CoV-2 viral load by patient age. Available from:  
402 [https://zoonosen.charite.de/fileadmin/user\\_upload/microsites/m\\_cc05/virologie-](https://zoonosen.charite.de/fileadmin/user_upload/microsites/m_cc05/virologie-ccm/dateien_upload/Weitere_Dateien/analysis-of-SARS-CoV-2-viral-load-by-patient-age.pdf)  
403 [ccm/dateien\\_upload/Weitere\\_Dateien/analysis-of-SARS-CoV-2-viral-load-by-patient-](https://zoonosen.charite.de/fileadmin/user_upload/microsites/m_cc05/virologie-ccm/dateien_upload/Weitere_Dateien/analysis-of-SARS-CoV-2-viral-load-by-patient-age.pdf)  
404 [age.pdf](https://zoonosen.charite.de/fileadmin/user_upload/microsites/m_cc05/virologie-ccm/dateien_upload/Weitere_Dateien/analysis-of-SARS-CoV-2-viral-load-by-patient-age.pdf). Accessed 2 December 2020.
- 405 25. Heald-Sargent T, Muller WJ, Zheng X, Rippe J, Patel AB, Kociolek LK. Age-Related  
406 Differences in Nasopharyngeal Severe Acute Respiratory Syndrome Coronavirus 2  
407 (SARS-CoV-2) Levels in Patients With Mild to Moderate Coronavirus Disease 2019  
408 (COVID-19). *JAMA Pediatr.* 2020;174(9):902-903. doi:  
409 [10.1001/jamapediatrics.2020.3651](https://doi.org/10.1001/jamapediatrics.2020.3651).

410 Table 1 Age distribution of included cases and age distribution of the province of Antwerp.

| <b>Age category</b> | <b>Number of inclusions</b> | <b>Percentage of inclusions</b> | <b>Percentage of inhabitants in the Antwerp province</b> | <b><i>p</i>-value (difference in rates of inclusions versus the Antwerp province)</b> |
|---------------------|-----------------------------|---------------------------------|----------------------------------------------------------|---------------------------------------------------------------------------------------|
| <b>0-10 y</b>       | 1971                        | 5.1                             | 11.3                                                     | <i>p</i> <0.01                                                                        |
| <b>11-20 y</b>      | 1493                        | 3.9                             | 11.0                                                     | <i>p</i> <0.01                                                                        |
| <b>21-30 y</b>      | 3942                        | 10.2                            | 12.1                                                     | <i>p</i> <0.01                                                                        |
| <b>31-40 y</b>      | 5110                        | 13.2                            | 13.1                                                     | <i>p</i> =0.83                                                                        |
| <b>41-50 y</b>      | 4376                        | 11.3                            | 12.7                                                     | <i>p</i> <0.01                                                                        |
| <b>51-60 y</b>      | 5993                        | 15.5                            | 14.0                                                     | <i>p</i> <0.01                                                                        |
| <b>61-70 y</b>      | 6194                        | 16.0                            | 11.8                                                     | <i>p</i> <0.01                                                                        |
| <b>71-80 y</b>      | 5651                        | 14.6                            | 8.2                                                      | <i>p</i> <0.01                                                                        |
| <b>81-90 y</b>      | 3450                        | 8.9                             | 4.9                                                      | <i>p</i> <0.01                                                                        |
| <b>+90 y</b>        | 583                         | 1.5                             | 1.0                                                      | <i>p</i> =0.23                                                                        |

411

412 Table 2. Overall positivity rate of SARS-CoV-2 in asymptomatic carriers according to age  
413 groups.

414

| <b>Age category</b> | <b>Overall percentage of positive tests</b> | <b>95% CI</b> |
|---------------------|---------------------------------------------|---------------|
| <b>0 - 10 y</b>     | 1.0                                         | 0.6 to 1.5    |
| <b>11 - 20 y</b>    | 1.3                                         | 0.8 to 2.0    |
| <b>21 - 30 y</b>    | 1.6                                         | 1.3 to 2.1    |
| <b>31 - 40 y</b>    | 1.6                                         | 1.3 to 2.0    |
| <b>41 - 50 y</b>    | 1.2                                         | 0.9 to 1.6    |
| <b>51 - 60 y</b>    | 1.0                                         | 0.7 to 1.2    |
| <b>61 - 70 y</b>    | 0.9                                         | 0.7 to 1.1    |
| <b>71 - 80 y</b>    | 1.2                                         | 0.9 to 1.5    |
| <b>81 - 90 y</b>    | 2.7                                         | 2.2 to 3.3    |
| <b>&gt; 90 y</b>    | 2.6                                         | 1.4 to 4.2    |

---

415

416 Figure 1. Estimated prevalence and incidence of SARS-CoV-2 carriers, estimated prevalence  
417 of carriers with high viral loads, percentages of cases with confirmed a positive SARS-CoV-2  
418 test and percentages of confirmed hospital admitted COVID cases in the Antwerp province.

419 Figure 2. Viral loads according to age groups in asymptomatic carriers (viral loads only  
420 available for GZA and ZNA).

421 Figure 3. Proportion of asymptomatic carriers with high viral loads according to age category.



medRxiv preprint doi: <https://doi.org/10.1101/2020.12.09.20246462>; this version posted December 24, 2020. The copyright holder for this preprint (which was not certified by peer review) is the author/funder, who has granted medRxiv a license to display the preprint in perpetuity.

It is made available under a [CC-BY-NC-ND 4.0 International license](https://creativecommons.org/licenses/by-nc-nd/4.0/).

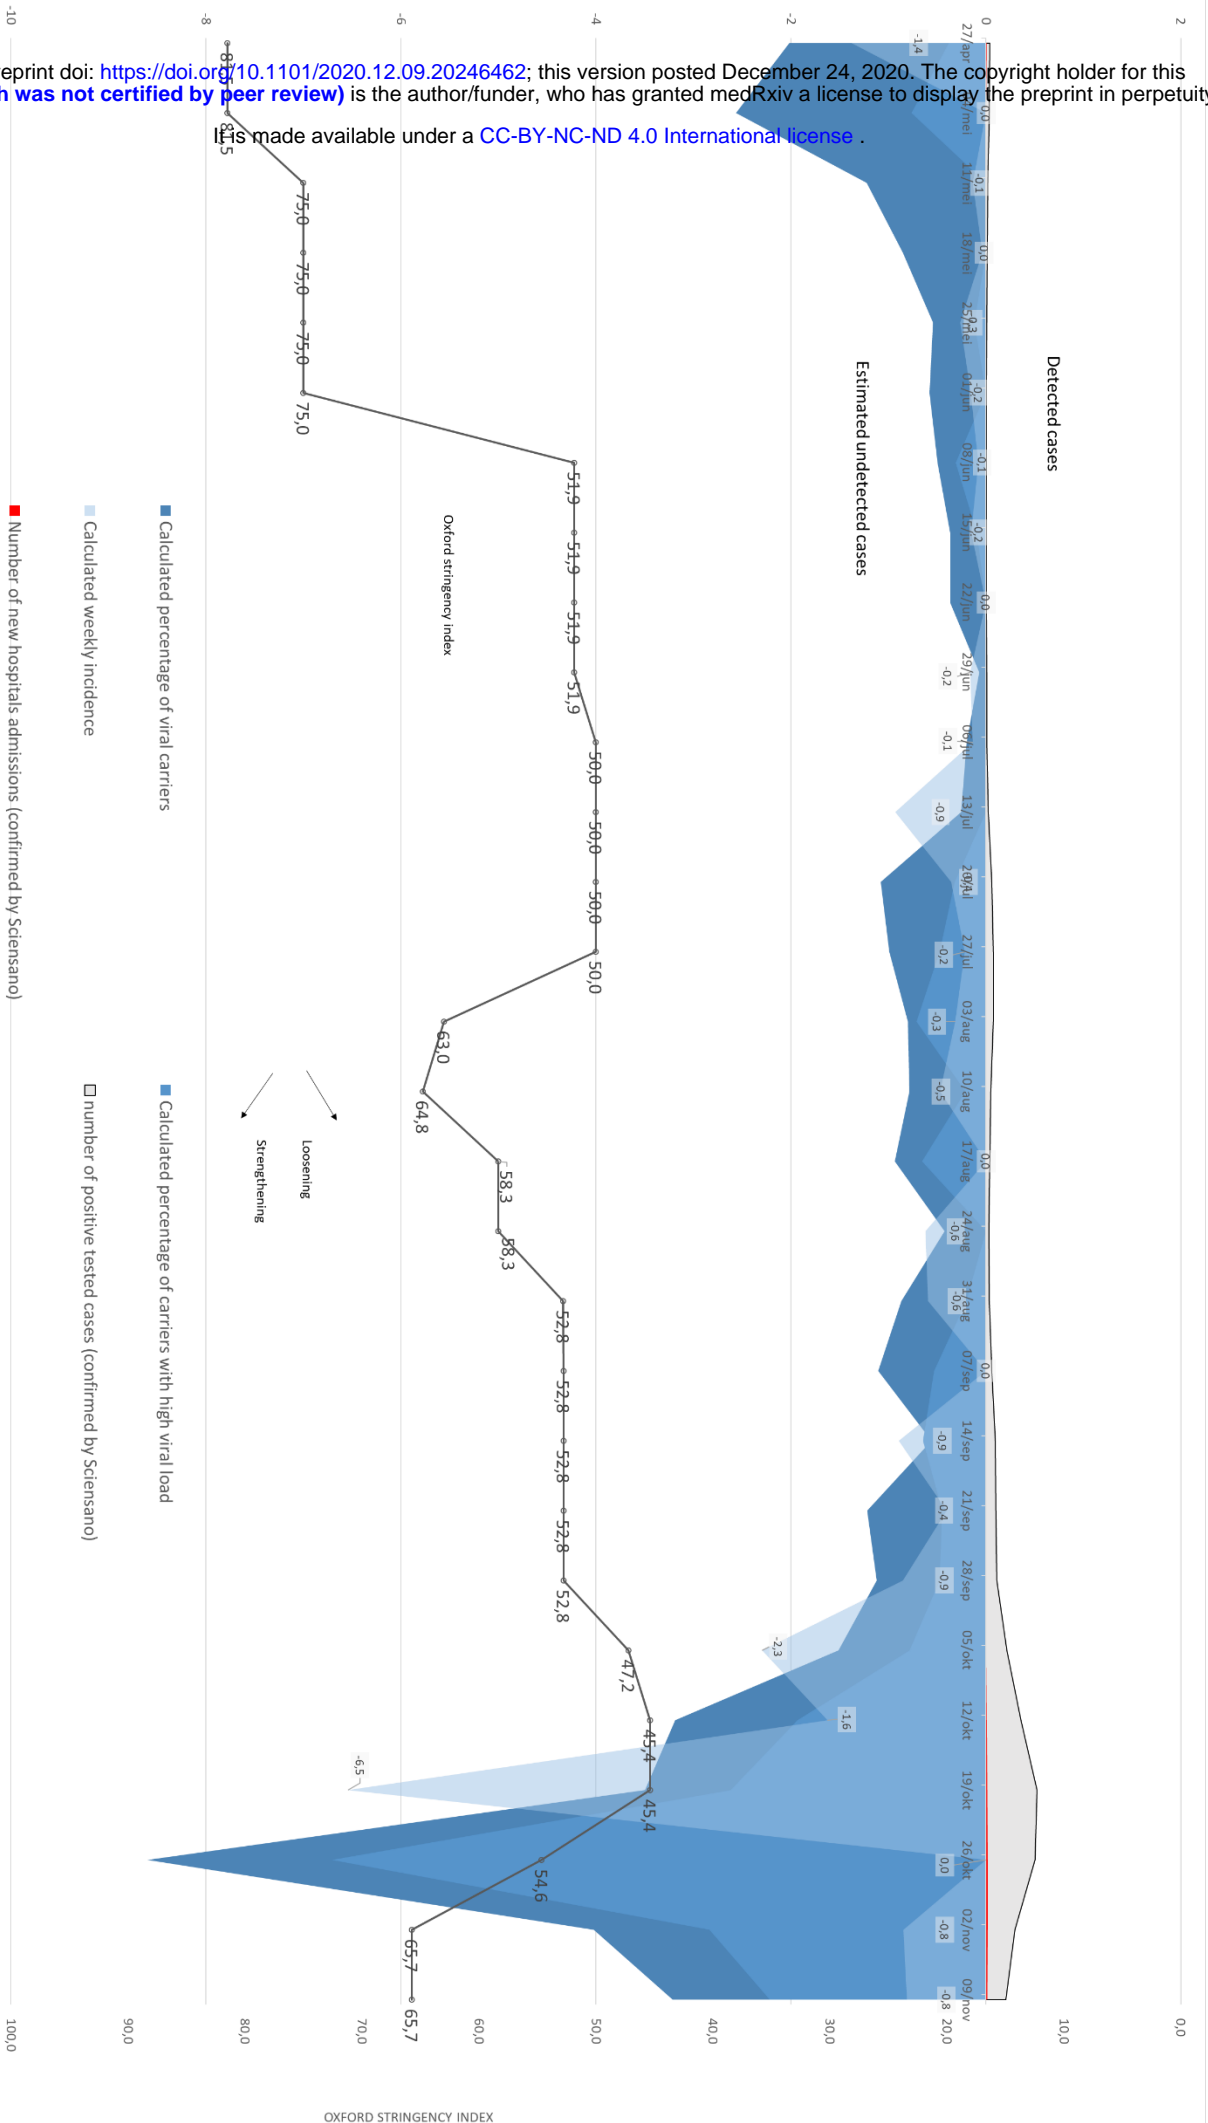

Distribution of log copies/mL SARS-CoV-2 in asymptomatic patients among different age categories

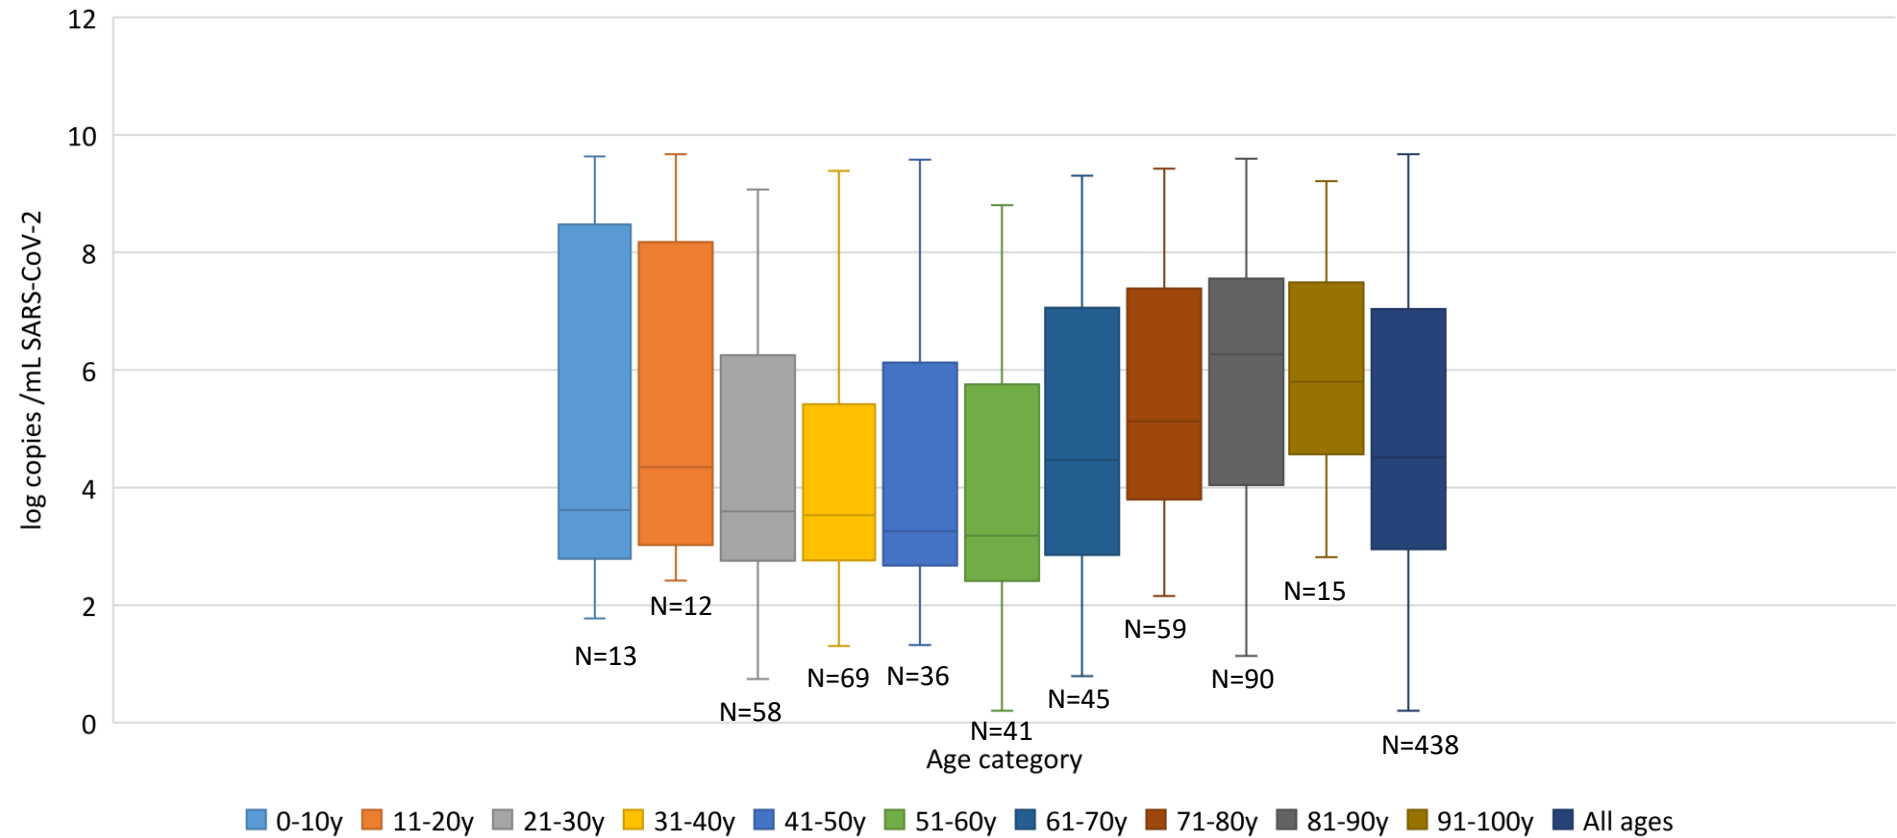

It is made available under a [CC-BY-NC-ND 4.0 International license](https://creativecommons.org/licenses/by-nc-nd/4.0/) .

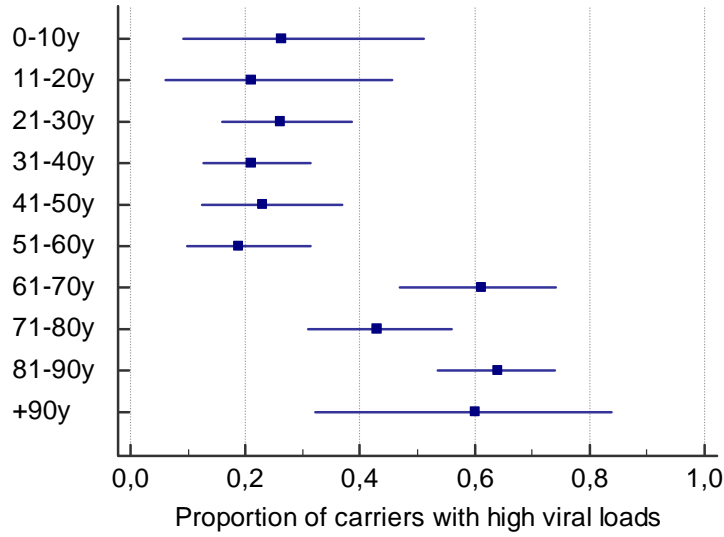

| Age category | Proportion of carriers with high viral loads (%) | 95 % CI   |
|--------------|--------------------------------------------------|-----------|
| 0-10y        | 26.3                                             | 9.1-51.2  |
| 11-20y       | 21.1                                             | 6.1-45.6  |
| 21-30y       | 26.2                                             | 16.0-38.5 |
| 31-40y       | 21.0                                             | 12.7-31.5 |
| 41-50y       | 23.1                                             | 12.5-36.8 |
| 51-60y       | 19.0                                             | 9.9-31.4  |
| 61-70y       | 61.1                                             | 46.9-74.1 |
| 71-80y       | 43.1                                             | 30.8-56.0 |
| 81-90y       | 64.1                                             | 53.5-73.9 |
| +90y         | 60.0                                             | 32.2-83.7 |
